# Supplementary material for: Health Benefits of Whey or Colostrum Supplementation in Adults ≥35 Years; a Systematic Review
Source: MDPI journal article supplement (doi:10.3390/nu12020299), 2020-01-22
Supplement: s1 [file s1]

## Supplementary Data

### Supplemental Table 1. Example search strategy

Ovid Medline (searched 5/9/2018) – no limitations or restrictions

|                 |                                                                |                  |
|-----------------|----------------------------------------------------------------|------------------|
| Adult OR adults | Colostrum OR<br>protein OR<br>proteins OR<br>whey OR<br>casein | Dairy<br>OR milk |
|-----------------|----------------------------------------------------------------|------------------|

Adult OR adults AND Colostrum OR protein OR proteins OR whey OR casein AND Dairy OR milk

**Supplemental Table 2. Risk of bias summary of included papers using the Cochrane Risk of Bias tool V2.0<sup>1</sup>**

|                      | Domain 1 | Domain 2 | Domain 3 | Domain 4 | Domain 5 | Risk of bias judgement |
|----------------------|----------|----------|----------|----------|----------|------------------------|
| Aoe 2005 [38]        |          |          |          |          |          | Some concerns          |
| Arciero 2014 [31]    |          |          |          |          |          | High                   |
| Baer 2011 [32]       |          |          |          |          |          | High                   |
| Bemben 2010 [30]     |          |          |          |          |          | High                   |
| Chale 2013 [41]      |          |          |          |          |          | Low                    |
| Duff 2014 [40]       |          |          |          |          |          | Some concerns          |
| Devries 2018 [39]    |          |          |          |          |          | Some concerns          |
| Eliot 2008 [29]      |          |          |          |          |          | Some concerns          |
| Farnfield 2012 [33]  |          |          |          |          |          | High                   |
| Francis 2017 [34]    |          |          |          |          |          | High                   |
| Frestedt 2008 [35]   |          |          |          |          |          | High                   |
| Hector 2015 [36]     |          |          |          |          |          | High                   |
| Kerstetter 2015 [42] |          |          |          |          |          | Low                    |
| Norton 2016 [37]     |          |          |          |          |          | High                   |
| Pal 2010a [27]       |          |          |          |          |          | Some concerns          |
| Pal 2010b [28]       |          |          |          |          |          | High                   |

\*\* Any paper with 3 or more 'some concerns' was determined to be high risk of bias \*\*

**KEY:**

Low risk of bias

Some concerns

High risk of bias

<sup>1</sup> Sterne J, Savovic J, Page M. RoB 2: a revised tool for assessing risk of bias in randomised trials. BMJ.

Domain 1 – Risk of bias arising from the randomisation process

Domain 2 – Risk of bias due to deviation from the intended intervention (effect of assignment to intervention)

Domain 3 – Missing outcome data

Domain 4 – Risk of bias in measurement of the outcome

Domain 5 – Risk of bias in selection of the reported result
